# Supplementary material for: Preparation and Characterization of Magnetic Fe3O4/CdWO4 and Fe3O4/CdWO4/PrVO4 Nanoparticles and Investigation of Their Photocatalytic and Anticancer Properties on PANC1 Cells
Source: MDPI journal article supplement (doi:10.3390/ma12193274), 2019-10-08
Supplement: s1 [file s1]

Article

# Preparation and characterization of magnetic $\text{Fe}_3\text{O}_4/\text{CdWO}_4$ and $\text{Fe}_3\text{O}_4/\text{CdWO}_4/\text{PrVO}_4$ nanoparticles and investigation of their photocatalytic and anticancer properties on PANC1 cells

Mohammad Amin Marsooli <sup>1,2</sup>, Mahdi Fasihi-Ramandi <sup>1,2</sup>, Kourosch Adib <sup>3</sup>, Saeid Pourmasoud <sup>4</sup>, Farhad Ahmadi <sup>5,6</sup>, Mohammad Reza Ganjali <sup>7,8</sup>, Ali Sobhani Nasab <sup>9,10</sup>, Mahdi Rahimi Nasrabadi <sup>1,2,\*</sup> and Marta E. Plonska-Brzezinska <sup>11,\*</sup>

<sup>1</sup> Department; Nanobiotechnology Research Center, Baqiyatallah University of Medical Sciences, Tehran postcode, Iran; mohammadamin.marsuli@gmail.com.

<sup>2</sup> Faculty of Pharmacy, Baqiyatallah University of Medical Sciences, Tehran postcode, Iran; fasihi.m@gmail.com.

<sup>3</sup> Department of Chemistry, Imam Hossein University, Tehran postcode, Iran; k\_anbaz@yahoo.com.

<sup>4</sup> Department of Physics, University of Kashan, Kashan postcode, Iran; SA\_POURMASOUD2007@yahoo.com.

<sup>5</sup> Physiology Research Center, Iran University of Medical Sciences, Tehran postcode, Iran; Farhadahmadi55@gmail.com.

<sup>6</sup> Department of Medicinal Chemistry, School of Pharmacy-International Campus, Iran University of Medical Sciences, Tehran postcode, Iran.

<sup>7</sup> Center of Excellence in Electrochemistry, Faculty of Chemistry, University of Tehran, Tehran postcode, Iran; Ganjali@gmail.com.

<sup>8</sup> Biosensor Research Centre, Endocrinology & Metabolism Molecular and Cellular Research Institute, Tehran University of Medical Sciences, Tehran postcode, Iran.

<sup>9</sup> Social Determinants of Health (SDH) Research Center, Kashan University of Medical Sciences, Kashan postcode, Iran; Ali.sobhaninasab@gmail.com.

<sup>10</sup> Core Research Lab, Kashan University of Medical Sciences, Kashan postcode, Iran.

<sup>11</sup> Department of Organic Chemistry, Faculty of Pharmacy with the Division of Laboratory Medicine, Medical University of Bialystok, Mickiewicza 2A, 15-222 Bialystok, Poland; marta.plonska-brzezinska@umb.edu.pl.

\* Correspondence: Rahiminasrabadi@gmail.com; Tel.: +98 2182483409 (M.R.N.); marta.plonska-brzezinska@umb.edu.pl (M.E.P-B.)

Received: 06 September 2019; Accepted: 04 October 2019; Published: date

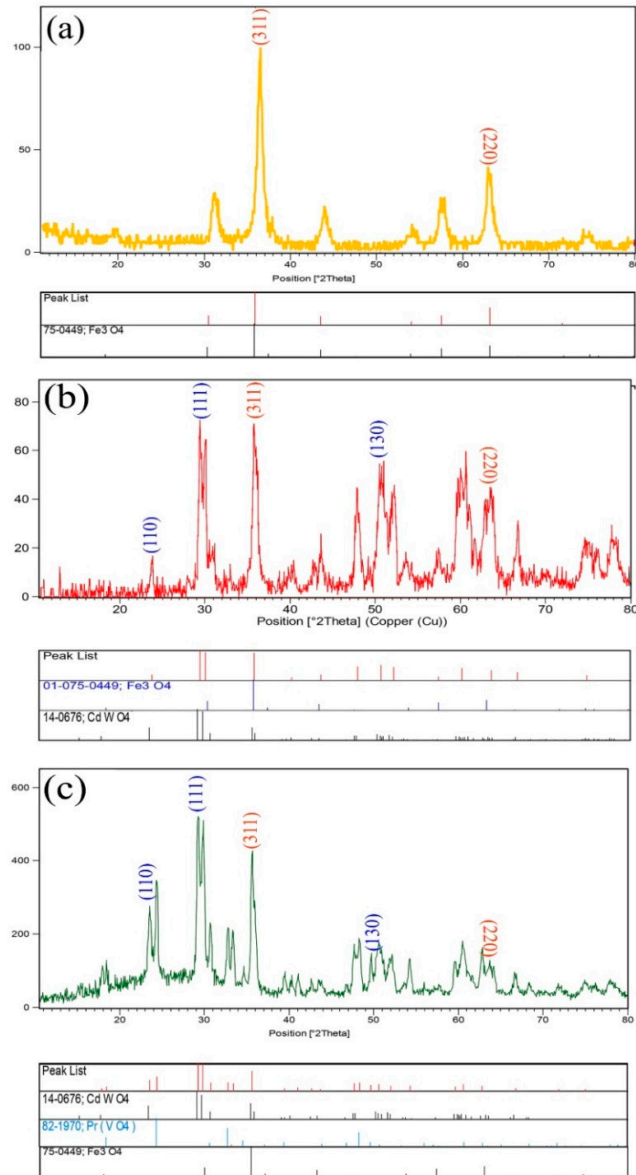

**Figure S1.** XRD patterns of (a)  $\text{Fe}_3\text{O}_4$ , (b)  $\text{Fe}_3\text{O}_4/\text{CdWO}_4$  (S1), and (c)  $\text{Fe}_3\text{O}_4/\text{CdWO}_4/\text{PrVO}_4$  (S4).

**Table S1.** Main reflections in XRD patterns of inorganic nanoparticles.

| Sample                                | 2 $\theta$ (degrees) | hkl   | Crystallite sizes<br>Dc<br>(nm) | Average Crystallite size | A (A)  | B (A)  | C (A)  |
|---------------------------------------|----------------------|-------|---------------------------------|--------------------------|--------|--------|--------|
|                                       |                      |       |                                 |                          |        |        |        |
| $\text{Fe}_3\text{O}_4$               | 35.6                 | (311) | 14.58                           | 14.1                     | 8.3740 | 8.3740 | 8.3740 |
|                                       | 63.1                 | (220) | 13.71                           |                          |        |        |        |
| $\text{Fe}_3\text{O}_4/\text{CdWO}_4$ | 35.6                 | (311) | 15.31                           | 33.5                     | 5.0290 | 5.8590 | 5.0740 |
|                                       | 63.1                 | (220) | 14.65                           |                          |        |        |        |
|                                       | 23.20                | (110) | 11.45                           |                          |        |        |        |

|                                                                      |       |       |       |    |        |        |        |
|----------------------------------------------------------------------|-------|-------|-------|----|--------|--------|--------|
|                                                                      | 29.00 | (111) | 12.45 |    |        |        |        |
|                                                                      | 51.11 | (130) | 13.48 |    |        |        |        |
|                                                                      | 35.6  | (311) | 15.96 |    |        |        |        |
|                                                                      | 63.1  | (220) | 15.22 |    |        |        |        |
|                                                                      | 23.20 | (110) | 12.43 |    |        |        |        |
| <b>Fe<sub>3</sub>O<sub>4</sub>/CdWO<sub>4</sub>/PrVO<sub>4</sub></b> | 29.00 | (111) | 13.24 | 55 | 7.3990 | 7.3990 | 6.4960 |
|                                                                      | 51.11 | (130) | 14.35 |    |        |        |        |
|                                                                      | 24.03 | (200) | 11.86 |    |        |        |        |
|                                                                      | 32.40 | (112) | 12.77 |    |        |        |        |
|                                                                      | 47.86 | (322) | 13.98 |    |        |        |        |

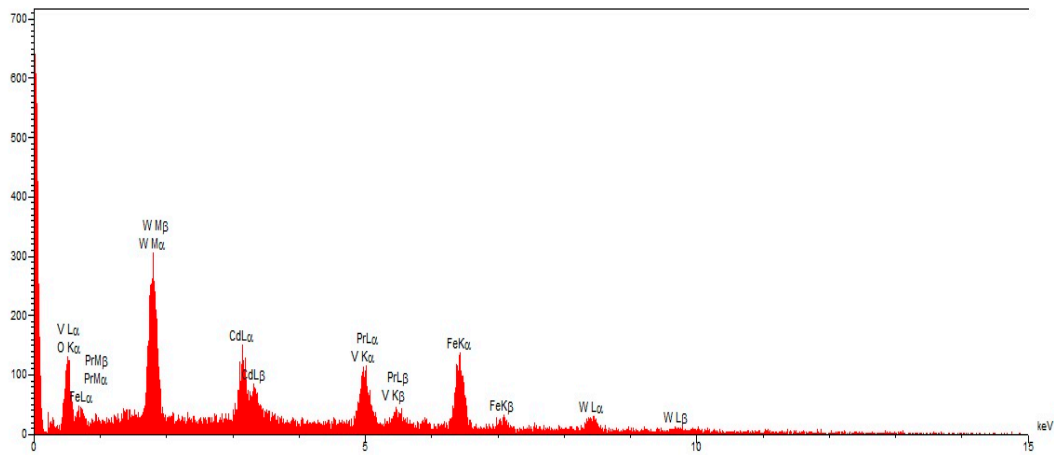

Figure S2. EDX spectrum of the Fe<sub>3</sub>O<sub>4</sub>/CdWO<sub>4</sub>/PrVO<sub>4</sub> (S<sub>4</sub>) sample.

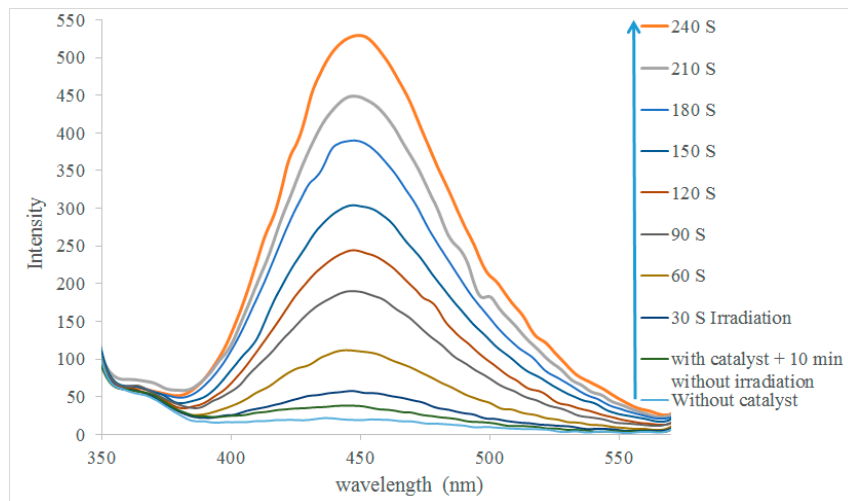

Figure S3. The temporal changes in fluorescence intensity under UV light (290 nm) irradiation for S<sub>4</sub>.

Table S2. The photoluminescence technique was used to study the generation of active •OH radicals for all sample (S1-S5).

| Sample | Intensity (after 240 s of irradiation) |
|--------|----------------------------------------|
| S1     | 350                                    |
| S2     | 410                                    |
| S3     | 485                                    |
| S4     | 525                                    |
| S5     | 500                                    |

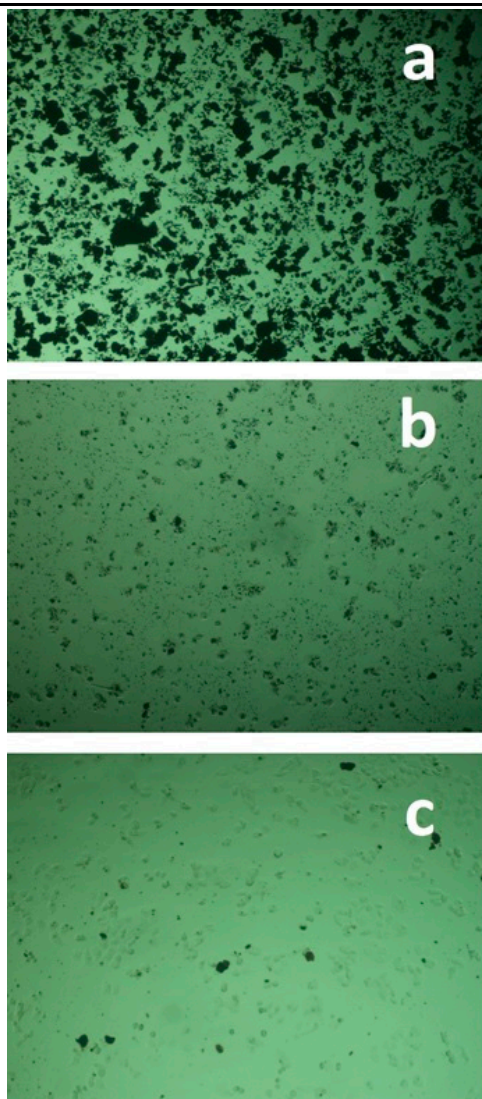

**Figure S4.** Microscopic photograph of PANC1 cell in the presence of S4 at three concentrations (a) 2, (b) 0.5, and (c) 0.0157 mg/mL.
